# Supplementary material for: A simulation-based evaluation of machine learning models for clinical decision support: application and analysis using hospital readmission
Source: PubMed Central journal article supplement (PMC8203794; doi:10.1038/s41746-021-00468-7), 2021-06-14
Supplement: 41746_2021_468_MOESM1_ESM.pdf [file 41746_2021_468_MOESM1_ESM.pdf]

**Supplementary Table 1:** Summary of surgical patient characteristics at UCLA RRMC from 2017 to 2018.

|                                                            |                |
|------------------------------------------------------------|----------------|
| Admissions                                                 | 19331          |
| Admissions with unplanned emergency department readmission | 969 (5.0%)     |
| Length of stay (days)                                      | 6 +/- 13       |
| Age (years)                                                | 54 +/- 18      |
| ASA Score:                                                 |                |
| 1                                                          | 1139 (5.9%)    |
| 2                                                          | 6628 (34.3%)   |
| 3                                                          | 9479 (49.0%)   |
| 4                                                          | 1776 (9.2%)    |
| 5                                                          | 113 (0.6%)     |
| NA                                                         | 196 (1.0%)     |
| Admissions with primary DRG code                           | 12469 (64.5%)  |
| Number of surgical CPT codes                               | 2 +/- 2        |
| Number of DRG codes                                        | 10 +/- 8       |
| Number of readmissions in preceding year                   | 1 +/- 1        |
| Surgical information*:                                     |                |
| Total blood loss (mL)                                      | 285 +/- 1216   |
| Total fluids transfused (mL)                               | 1110 +/- 807   |
| Total colloid transfused (mL)                              | 636 +/- 531    |
| Total blood transfused (mL)                                | 105 +/- 847    |
| Duration of anesthesia (minutes)                           | 250 +/- 163    |
| Hemodialysis                                               | 350 (1.8%)     |
| Tracheostomy (number of admissions)                        | 346 (1.8%)     |
| Mechanical ventilation (number of admissions)              | 2228 (11.5%)   |
| Duration of mechanical ventilation* (minutes)              | 6081 +/- 13256 |
| Disposition:                                               |                |
| Home or self care                                          | 14074 (72.8%)  |
| Home health service                                        | 3532 (18.3%)   |
| Skilled nursing facility                                   | 668 (3.5%)     |

|                                |              |
|--------------------------------|--------------|
| Other                          | 1057 (5.5%)  |
| Surgical Service Lines         |              |
| Cardiac Surgery                | 1455 (7.5%)  |
| General Surgery                | 3407 (17.6%) |
| Liver Transplant               | 563 (2.9%)   |
| Neurosurgery                   | 2055 (10.6%) |
| Obstetrics and Gynecology      | 1199 (6.2%)  |
| Ophthalmology                  | 216 (1.1%)   |
| Oral and Maxillofacial Surgery | 308 (1.6%)   |
| Orthopaedics                   | 1182 (6.1%)  |
| Other                          | 120 (0.6%)   |
| Otolaryngology                 | 2829 (14.6%) |
| Pediatric Surgery              | 68 (0.4%)    |
| Plastic Surgery                | 918 (4.7%)   |
| Radiation Oncology             | 103 (0.5%)   |
| Radiology                      | 2 (0.0%)     |
| Surgical Oncology              | 535 (2.8%)   |
| Thoracic Surgery               | 792 (4.1%)   |
| Urology                        | 2557 (13.2%) |
| Vascular Surgery               | 1022 (5.3%)  |

**Table Legend:** Values are reported as either “number of admissions (% of total data set)” or as “mean +/- standard deviation”. For variables or groups of variables marked with \*, the mean and standard deviation are taken over observations with non-missing values for those variables.

**Supplementary Table 2:** Patient performance metrics for the four different models under different effectiveness constants.

| Schedule  | Capacity | Method           | PS   | RA  | ERP (5%) | ERP (10%) | ERP (20%) |
|-----------|----------|------------------|------|-----|----------|-----------|-----------|
| M         | 8        | L1LR (with labs) | 866  | 258 | 12.9     | 25.8      | 51.6      |
| M         | 8        | L1LR (no labs)   | 861  | 155 | 7.8      | 15.5      | 31.0      |
| M         | 8        | LACE             | 845  | 91  | 4.6      | 9.1       | 18.2      |
| M         | 8        | HOSPITAL         | 845  | 86  | 4.3      | 8.6       | 17.2      |
| M W       | 8        | L1LR (with labs) | 1705 | 423 | 21.2     | 42.3      | 84.6      |
| M W       | 8        | L1LR (no labs)   | 1699 | 263 | 13.2     | 26.3      | 52.6      |
| M W       | 8        | LACE             | 1688 | 178 | 8.9      | 17.8      | 35.6      |
| M W       | 8        | HOSPITAL         | 1688 | 173 | 8.7      | 17.3      | 34.6      |
| M T W R F | 8        | L1LR (with labs) | 4199 | 672 | 33.6     | 67.2      | 134.4     |
| M T W R F | 8        | L1LR (no labs)   | 4196 | 502 | 25.1     | 50.2      | 100.4     |
| M T W R F | 8        | LACE             | 4215 | 456 | 22.8     | 45.6      | 91.2      |
| M T W R F | 8        | HOSPITAL         | 4215 | 437 | 21.9     | 43.7      | 87.4      |

**Table Legend:** Under “Method”, “L1 LR” denotes L1 regularized logistic regression. “Schedule” indicates the days of the week on which the provider works (M = Monday, T = Tuesday, W = Wednesday, R = Thursday, F = Friday). For the last four columns, PS denotes the number of patients seen (how many patients were seen by the provider over the simulation horizon); RA denotes the number of readmissions anticipated (how many patients were seen by the provider and had an ER readmission); ERP denotes the expected readmissions prevented (RA multiplied by the effectiveness coefficient, assumed to be 10%); and RLOS denotes the readmission length of stay (sum of the LOS at readmission of those patients who were selected and who had an ER readmission).

**Supplementary Table 3:** Cost performance metrics for the four different models under different effectiveness constants.

| Schedule  | Method           | ERCS @ 5% | ENCS @ 5% | ERCS @ 10% | ENCS @ 10% | ERCS @ 20% | ENCS @ 20% |
|-----------|------------------|-----------|-----------|------------|------------|------------|------------|
| M         | L1LR (with labs) | 187,295   | 114,695   | 374,590    | 301,990    | 749,180    | 676,580    |
| M         | L1LR (no labs)   | 111,600   | 39,000    | 223,200    | 150,600    | 446,400    | 373,800    |
| M         | LACE             | 66,045    | (6,555)   | 132,090    | 59,490     | 264,180    | 191,580    |
| M         | HOSPITAL         | 62,620    | (9,980)   | 125,240    | 52,640     | 250,480    | 177,880    |
| M W       | L1LR (with labs) | 307,135   | 161,935   | 614,270    | 469,070    | 1,228,540  | 1,083,340  |
| M W       | L1LR (no labs)   | 189,535   | 44,335    | 379,070    | 233,870    | 758,140    | 612,940    |
| M W       | LACE             | 128,860   | (16,340)  | 257,720    | 112,520    | 515,440    | 370,240    |
| M W       | HOSPITAL         | 125,665   | (19,535)  | 251,330    | 106,130    | 502,660    | 357,460    |
| M T W R F | L1LR (with labs) | 488,800   | 35,050    | 977,600    | 523,850    | 1,955,200  | 1,501,450  |
| M T W R F | L1LR (no labs)   | 363,275   | (90,475)  | 726,550    | 272,800    | 1,453,100  | 999,350    |
| M T W R F | LACE             | 330,920   | (122,830) | 661,840    | 208,090    | 1,323,680  | 869,930    |
| M T W R F | HOSPITAL         | 317,540   | (136,210) | 635,080    | 181,330    | 1,270,160  | 816,410    |

**Table Legend:** Under “Method”, “L1 LR” denotes L1 regularized logistic regression. “Schedule” indicates the days of the week on which the provider works (M = Monday, T = Tuesday, W = Wednesday, R = Thursday, F = Friday). The columns report the expected readmission cost savings (ERCS) and expected net cost savings (ENCS) at different effectiveness constants (5%, 10%, 20%). Note that 10% corresponds to the base case shown in Tables 2 and 3. The capacity, provider cost (PC) and expected readmission cost (ERC) are the same as in Table 3, and are omitted to facilitate presentation. Parenthesized quantities in red font correspond to negative values (i.e., expected net cost savings that are negative, where the provider cost exceeds the expected readmission cost savings).

**Supplementary Table 4:** Cost performance metrics for the four different models under different provider costs.

| Schedule  | Method           | PC (0.5x) | ENCS (0.5x) | PC (1x) | ENCS (1x) | PC (2x) | ENCS (2x) |
|-----------|------------------|-----------|-------------|---------|-----------|---------|-----------|
| M         | L1LR (with labs) | 36,300    | 338,290     | 72,600  | 301,990   | 145,200 | 229,390   |
| M         | L1LR (no labs)   | 36,300    | 186,900     | 72,600  | 150,600   | 145,200 | 78,000    |
| M         | LACE             | 36,300    | 95,790      | 72,600  | 59,490    | 145,200 | (13,110)  |
| M         | HOSPITAL         | 36,300    | 88,940      | 72,600  | 52,640    | 145,200 | (19,960)  |
| M W       | L1LR (with labs) | 72,600    | 541,670     | 145,200 | 469,070   | 290,400 | 323,870   |
| M W       | L1LR (no labs)   | 72,600    | 306,470     | 145,200 | 233,870   | 290,400 | 88,670    |
| M W       | LACE             | 72,600    | 185,120     | 145,200 | 112,520   | 290,400 | (32,680)  |
| M W       | HOSPITAL         | 72,600    | 178,730     | 145,200 | 106,130   | 290,400 | (39,070)  |
| M T W R F | L1LR (with labs) | 226,875   | 750,725     | 453,750 | 523,850   | 907,500 | 70,100    |
| M T W R F | L1LR (no labs)   | 226,875   | 499,675     | 453,750 | 272,800   | 907,500 | (180,950) |
| M T W R F | LACE             | 226,875   | 434,965     | 453,750 | 208,090   | 907,500 | (245,660) |
| M T W R F | HOSPITAL         | 226,875   | 408,205     | 453,750 | 181,330   | 907,500 | (272,420) |

**Table Legend:** Under “Method”, “L1 LR” denotes L1 regularized logistic regression. “Schedule” indicates the days of the week on which the provider works (M = Monday, T = Tuesday, W = Wednesday, R = Thursday, F = Friday). The columns report the provider cost (PC) and expected net cost savings (ENCS) under three different scenarios for provider cost (the provider cost is 0.5, 1 or 2 times the provider cost in the base case). Note that “1x” corresponds to the base case in Table 3. The capacity, expected readmission cost and expected readmission cost savings are the same as in Table 3, and are omitted to facilitate presentation. Parenthesized quantities in red font correspond to negative values (i.e., expected net cost savings that are negative, where the provider cost exceeds the expected readmission cost savings).

**Supplementary Table 5:** Cost performance metrics for the four different models under alternate provider cost model.

| Schedule  | Method           | PC          | ENCS        | PC          | ENCS        | PC          | ENCS        |
|-----------|------------------|-------------|-------------|-------------|-------------|-------------|-------------|
|           |                  | (\$100/pat) | (\$100/pat) | (\$200/pat) | (\$200/pat) | (\$300/pat) | (\$300/pat) |
| M         | L1LR (with labs) | 86,600      | 287,990     | 173,200     | 201,390     | 259,800     | 114,790     |
| M         | L1LR (no labs)   | 86,100      | 137,100     | 172,200     | 51,000      | 258,300     | (35,100)    |
| M         | LACE             | 84,500      | 47,590      | 169,000     | (36,910)    | 253,500     | (121,410)   |
| M         | HOSPITAL         | 84,500      | 40,740      | 169,000     | (43,760)    | 253,500     | (128,260)   |
| M W       | L1LR (with labs) | 170,500     | 443,770     | 341,000     | 273,270     | 511,500     | 102,770     |
| M W       | L1LR (no labs)   | 169,900     | 209,170     | 339,800     | 39,270      | 509,700     | (130,630)   |
| M W       | LACE             | 168,800     | 88,920      | 337,600     | (79,880)    | 506,400     | (248,680)   |
| M W       | HOSPITAL         | 168,800     | 82,530      | 337,600     | (86,270)    | 506,400     | (255,070)   |
| M T W R F | L1LR (with labs) | 419,900     | 557,700     | 839,800     | 137,800     | 1,259,700   | (282,100)   |
| M T W R F | L1LR (no labs)   | 419,600     | 306,950     | 839,200     | (112,650)   | 1,258,800   | (532,250)   |
| M T W R F | LACE             | 421,500     | 240,340     | 843,000     | (181,160)   | 1,264,500   | (602,660)   |
| M T W R F | HOSPITAL         | 421,500     | 213,580     | 843,000     | (207,920)   | 1,264,500   | (629,420)   |

**Table Legend:** Under “Method”, “L1 LR” denotes L1 regularized logistic regression. “Schedule” indicates the days of the week on which the provider works (M = Monday, T = Tuesday, W = Wednesday, R = Thursday, F = Friday). The columns report the provider cost (PC) and expected net cost savings (ENCS) under an alternate provider cost model, where there is a cost to each patient seen by the provider (the six columns correspond to three scenarios for this variable cost: \$100 per patient seen, \$200 per patient seen and \$300 per patient seen). The provider cost is calculated by multiplying the PS metric by each of the three per-patient costs. The capacity, expected readmission cost and expected readmission cost savings are the same as in Table 3, and are omitted to facilitate presentation. Parenthesized quantities in red font correspond to negative values (i.e., expected net cost savings that are negative, where the provider cost exceeds the expected readmission cost savings).
